# Supplementary material for: HIV persists throughout deep tissues with repopulation from multiple anatomical sources
Source: JCI journal article supplement (doi:10.1172/jci134815), 2020-01-07
Supplement: sd2 [file 2]

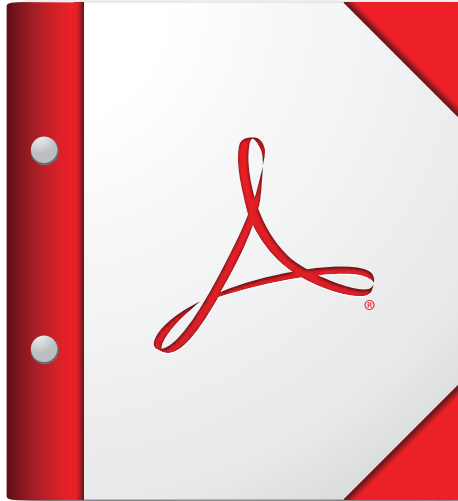

**For the best experience, open this PDF portfolio in  
Acrobat X or Adobe Reader X, or later.**

[Get Adobe Reader Now!](#)
